# Supplementary material
Source: publisher site journal article supplement (https://www.dovepress.com/article/415116)

# Supplementary Material

**Supplementary Figure 1** Exemplary healthy eating calculations for a man candidate for major orthopedic surgery.





**Notes: a)** Parameters to be considered for setting a dietary plan in a man between 60-74 years of age, body weight of 73 kg, height of 180 cm, sedentary lifestyle, daily energy requirement in preparation for surgery 2190 kcal, and protein 1.35 g/kg of body weight. **b)** Qualitative values of the dietary plan. **c)** Composition of a daily plan that comprises three main meals (breakfast, lunch, dinner) and two snacks (morning and afternoon). Energy per gram of food component = 4 kcal for proteins, 9 kcal for lipids, 4 kcal for carbohydrates, 2 kcal for fiber. **d)** Histograms showing the daily trends for energy (kcal), protein (g), lipid (g), and carbohydrate (g) intakes at breakfast (B), morning snack (MS), lunch (L), afternoon snack (AS), and dinner (D). The tables report the energy intakes at each meal and the energetic contribution of the three macromolecules.

**Supplementary Material** Dietary and nutritional indications to be included in the patient information booklet – Page 1.


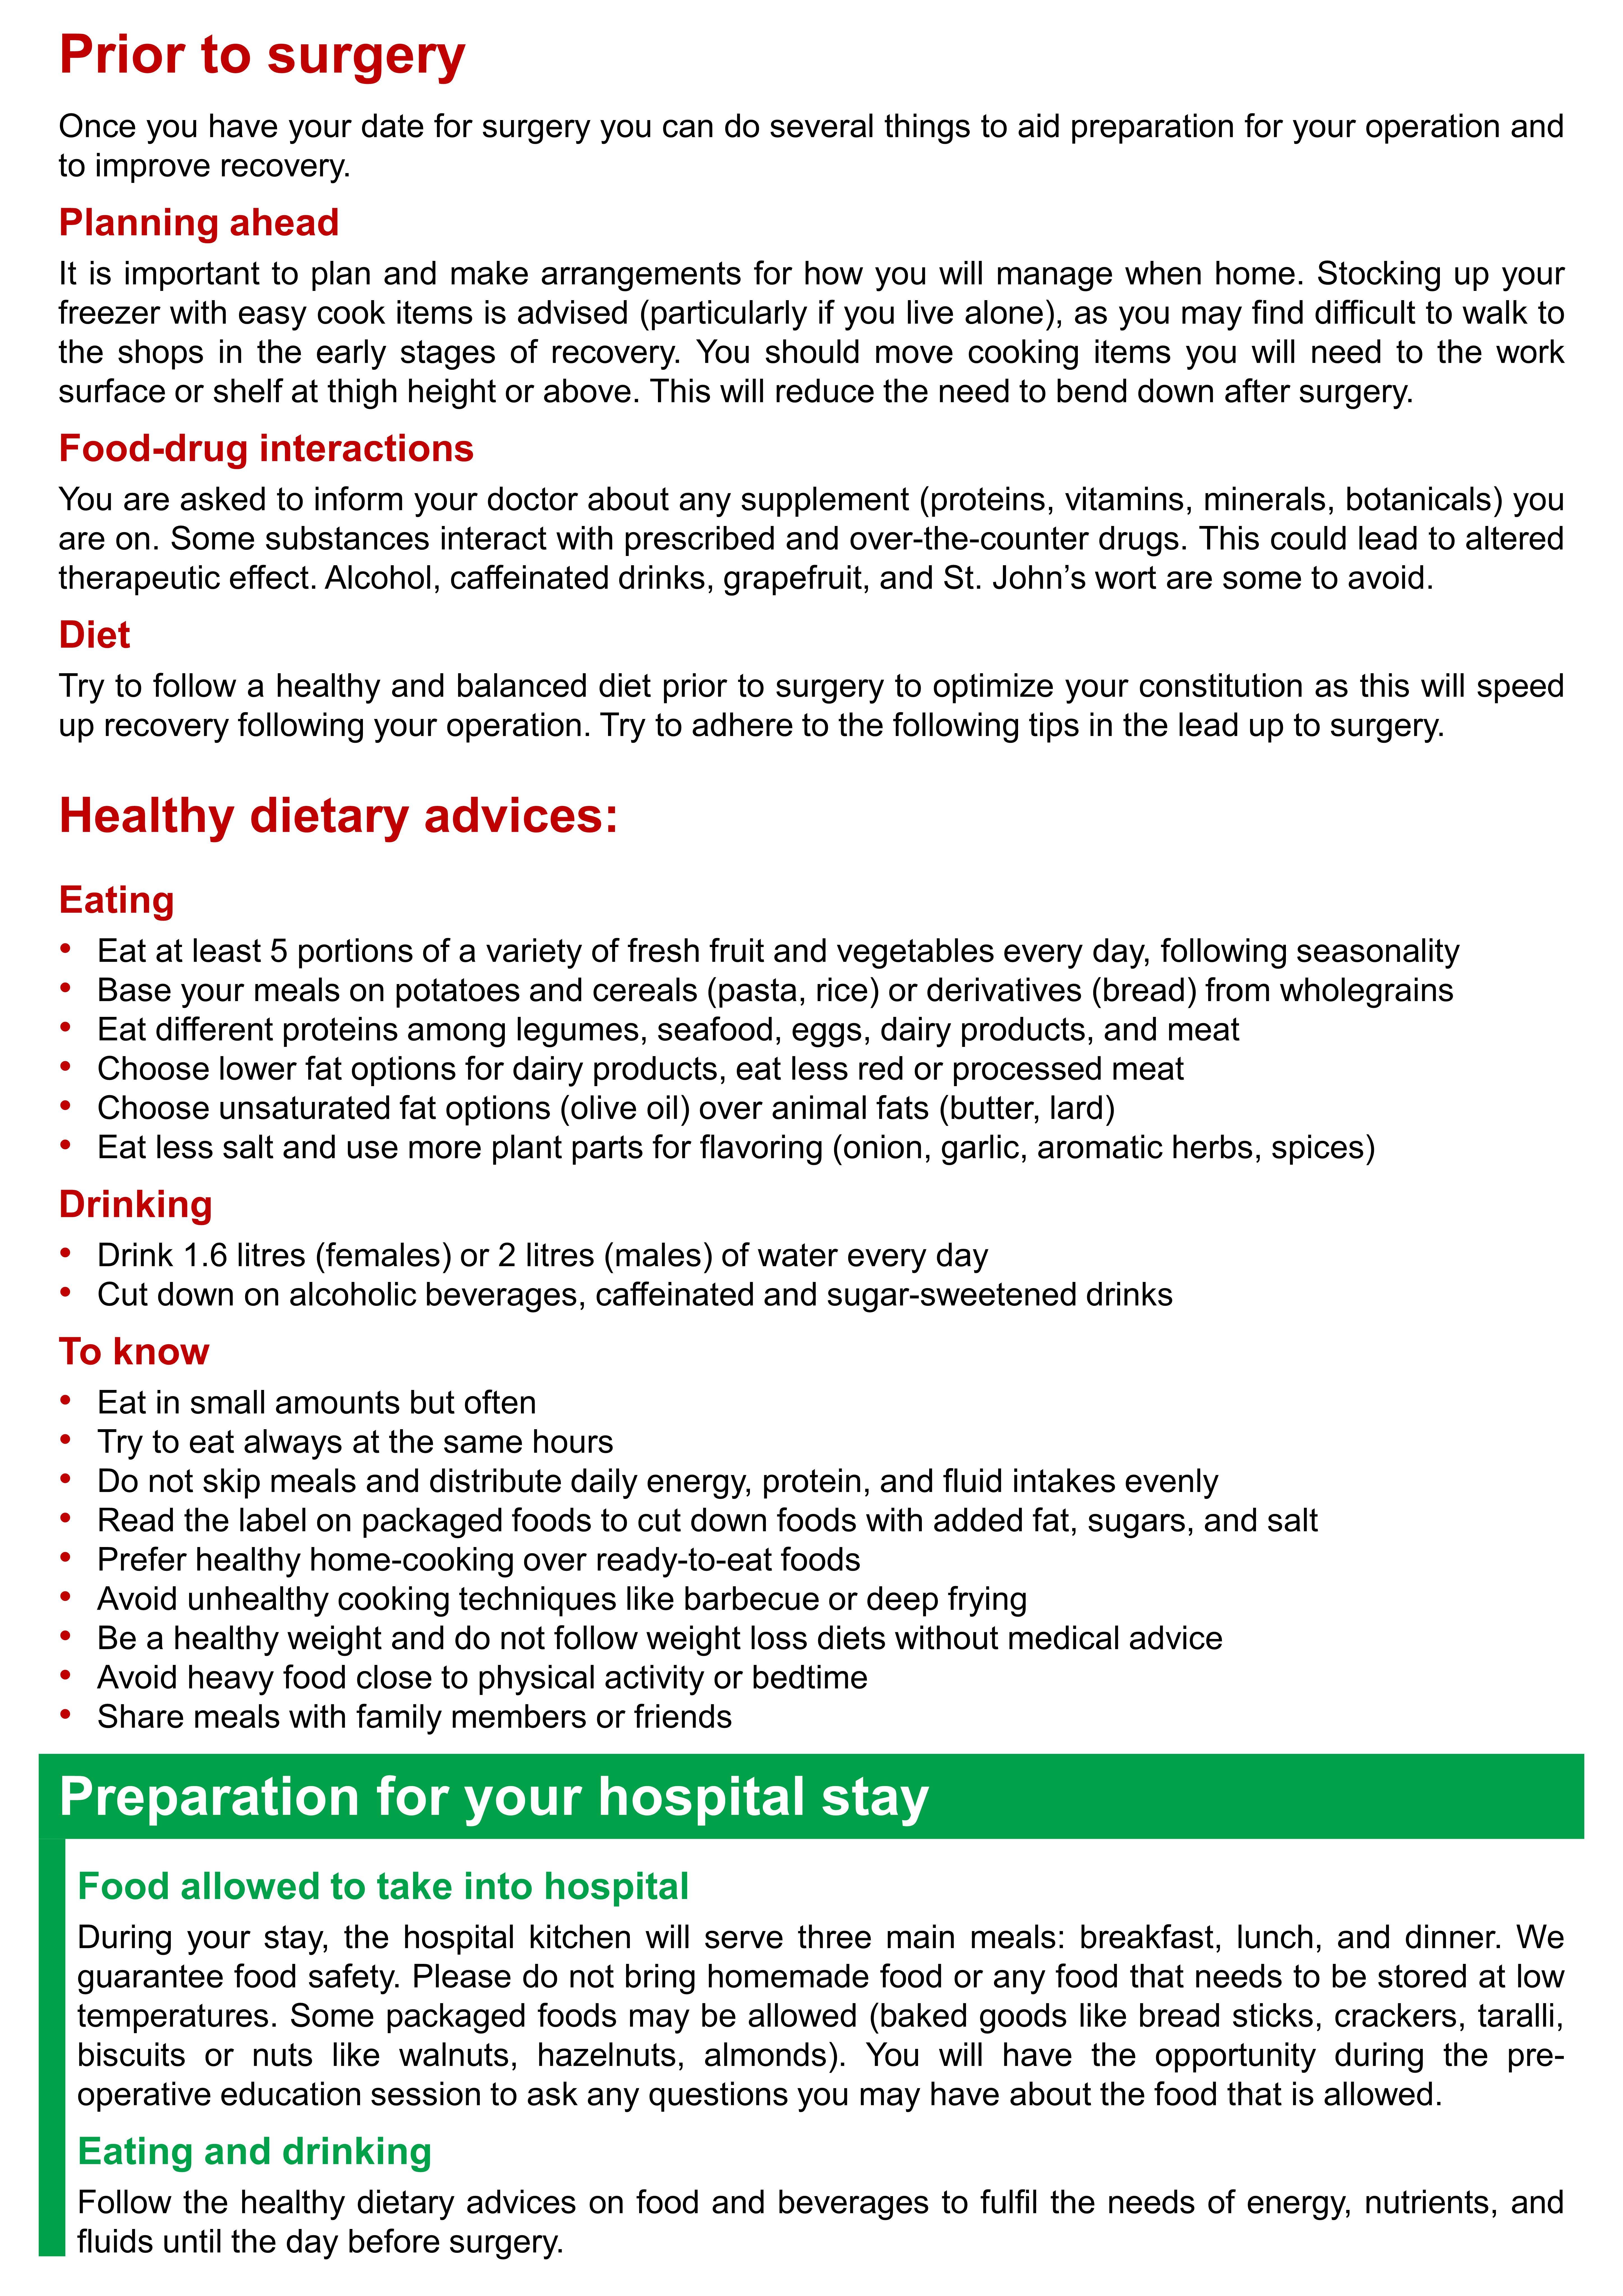


**Supplementary Material** Dietary and nutritional indications to be included in the patient information booklet – Page 2.


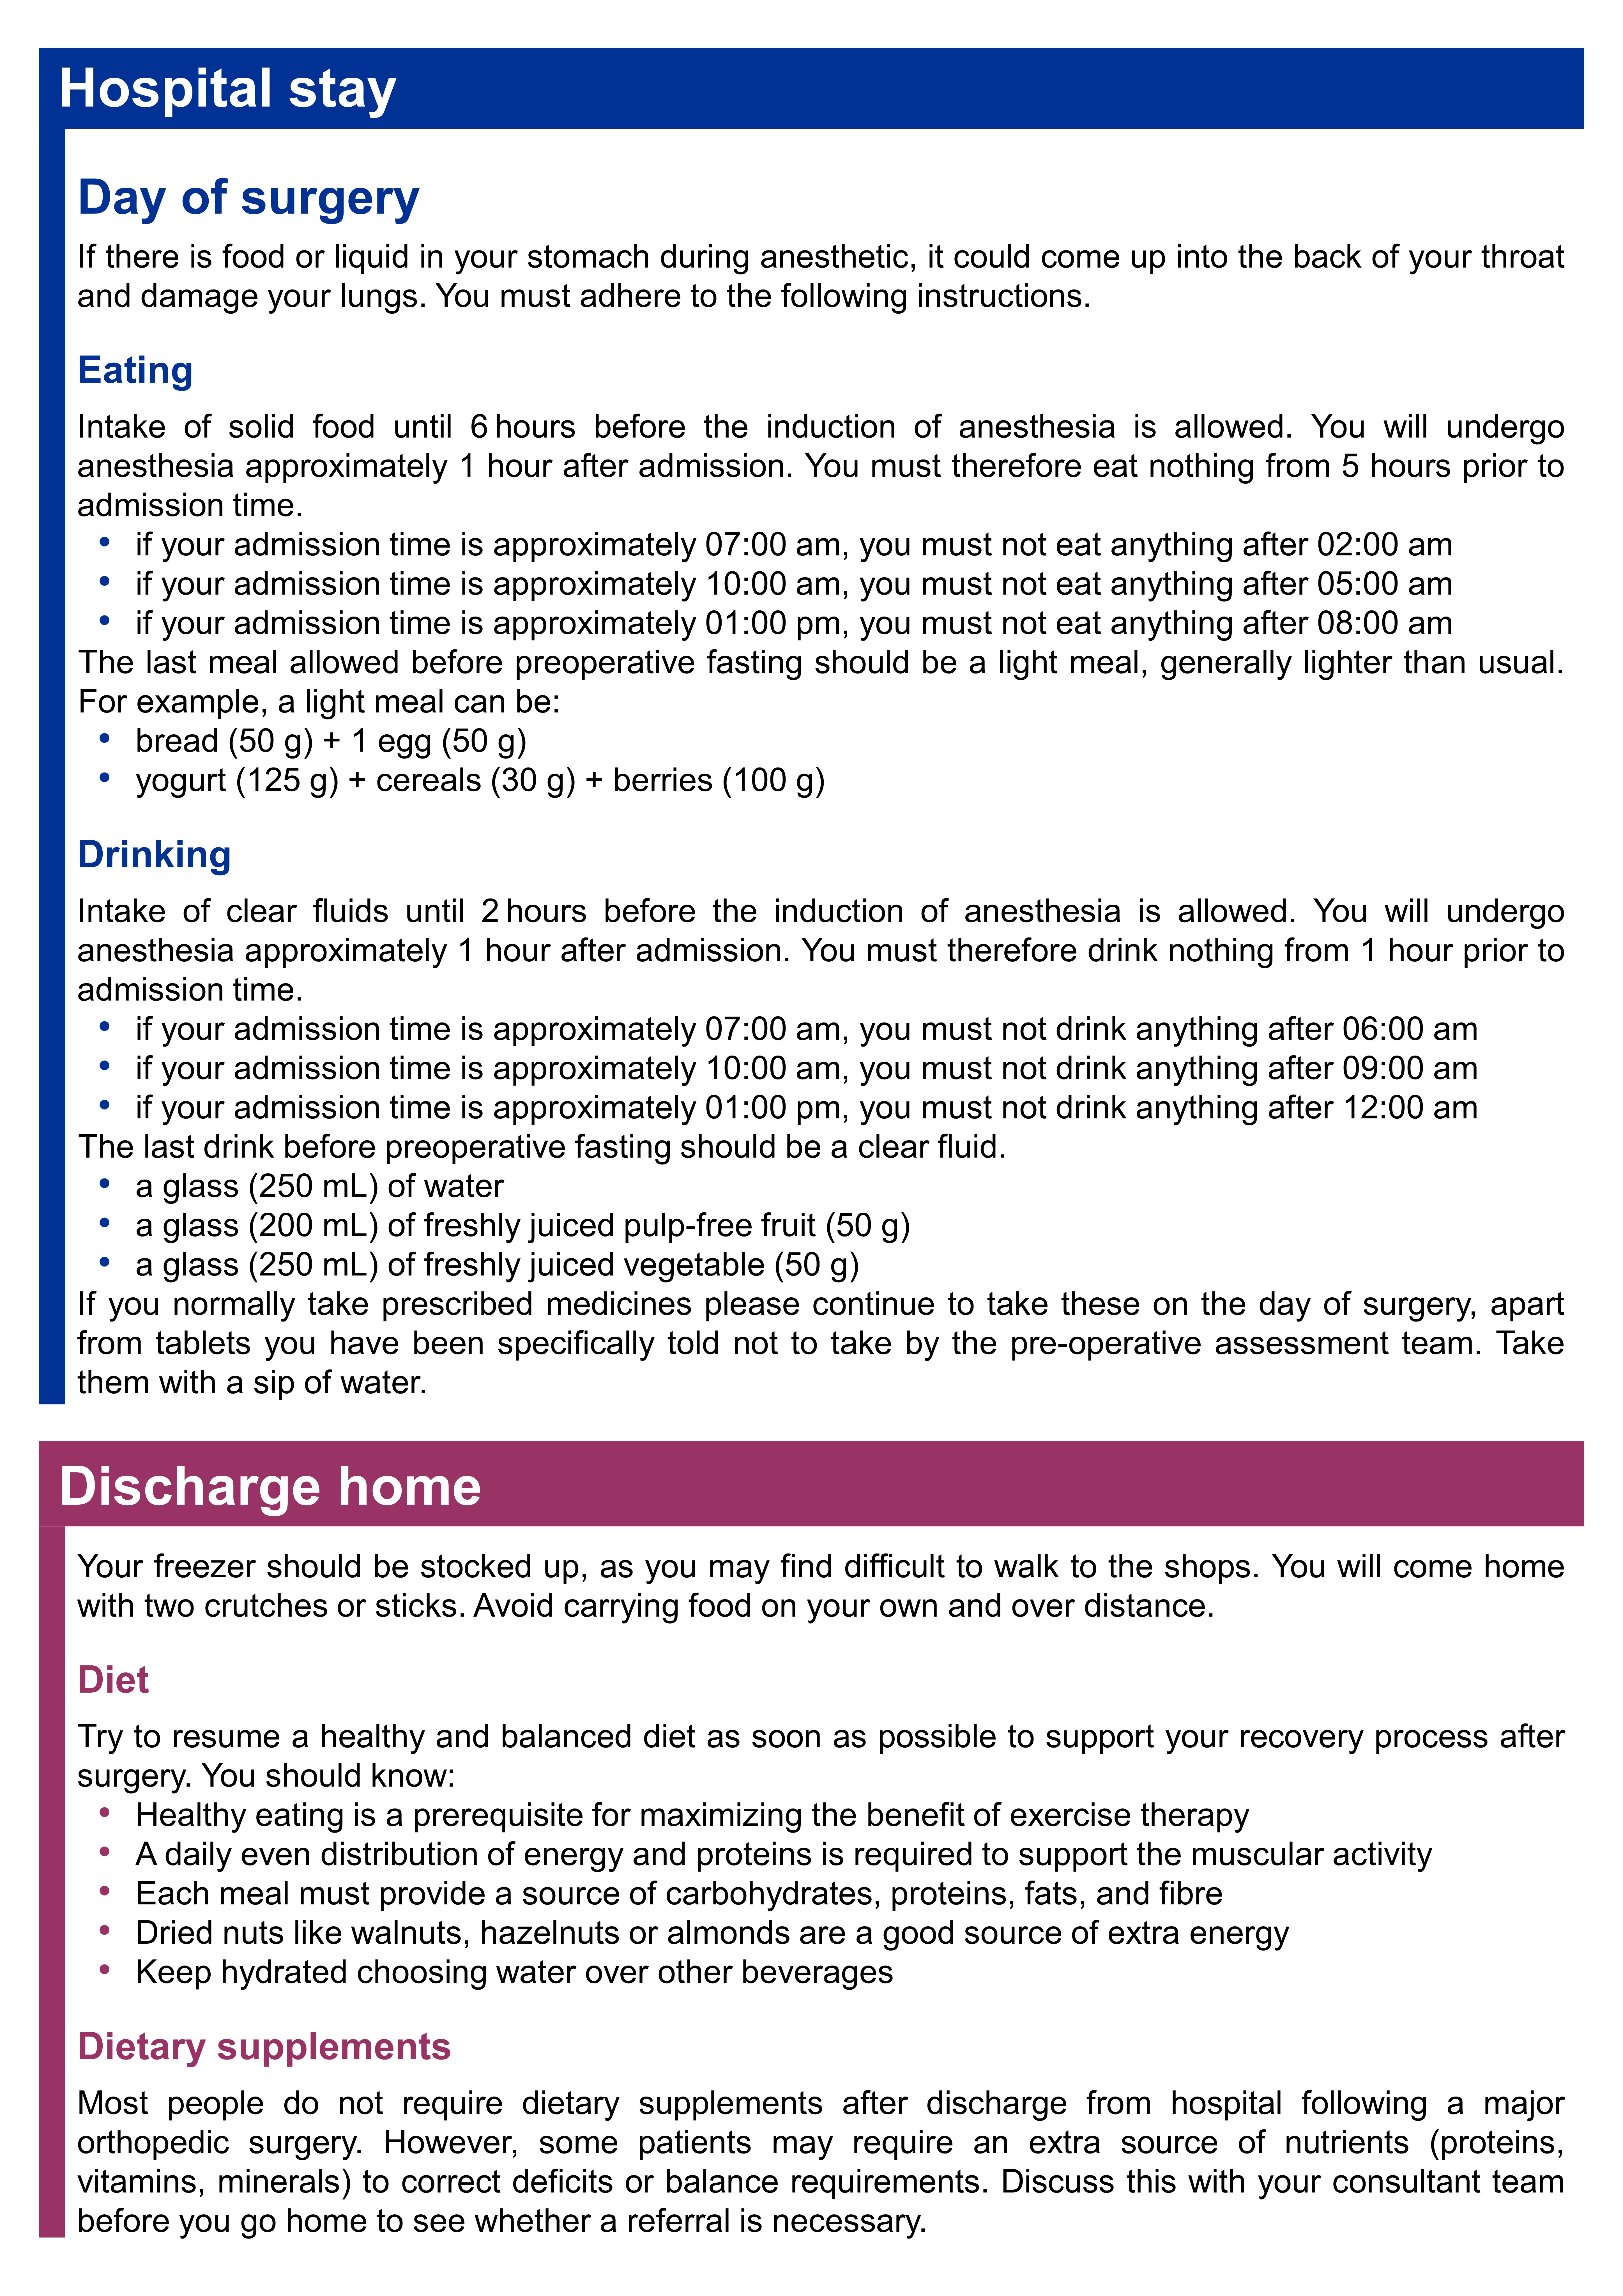


**Supplementary Figure 2** Illustration that educates the patient on the principles of healthy eating in preparation for major orthopedic surgery.


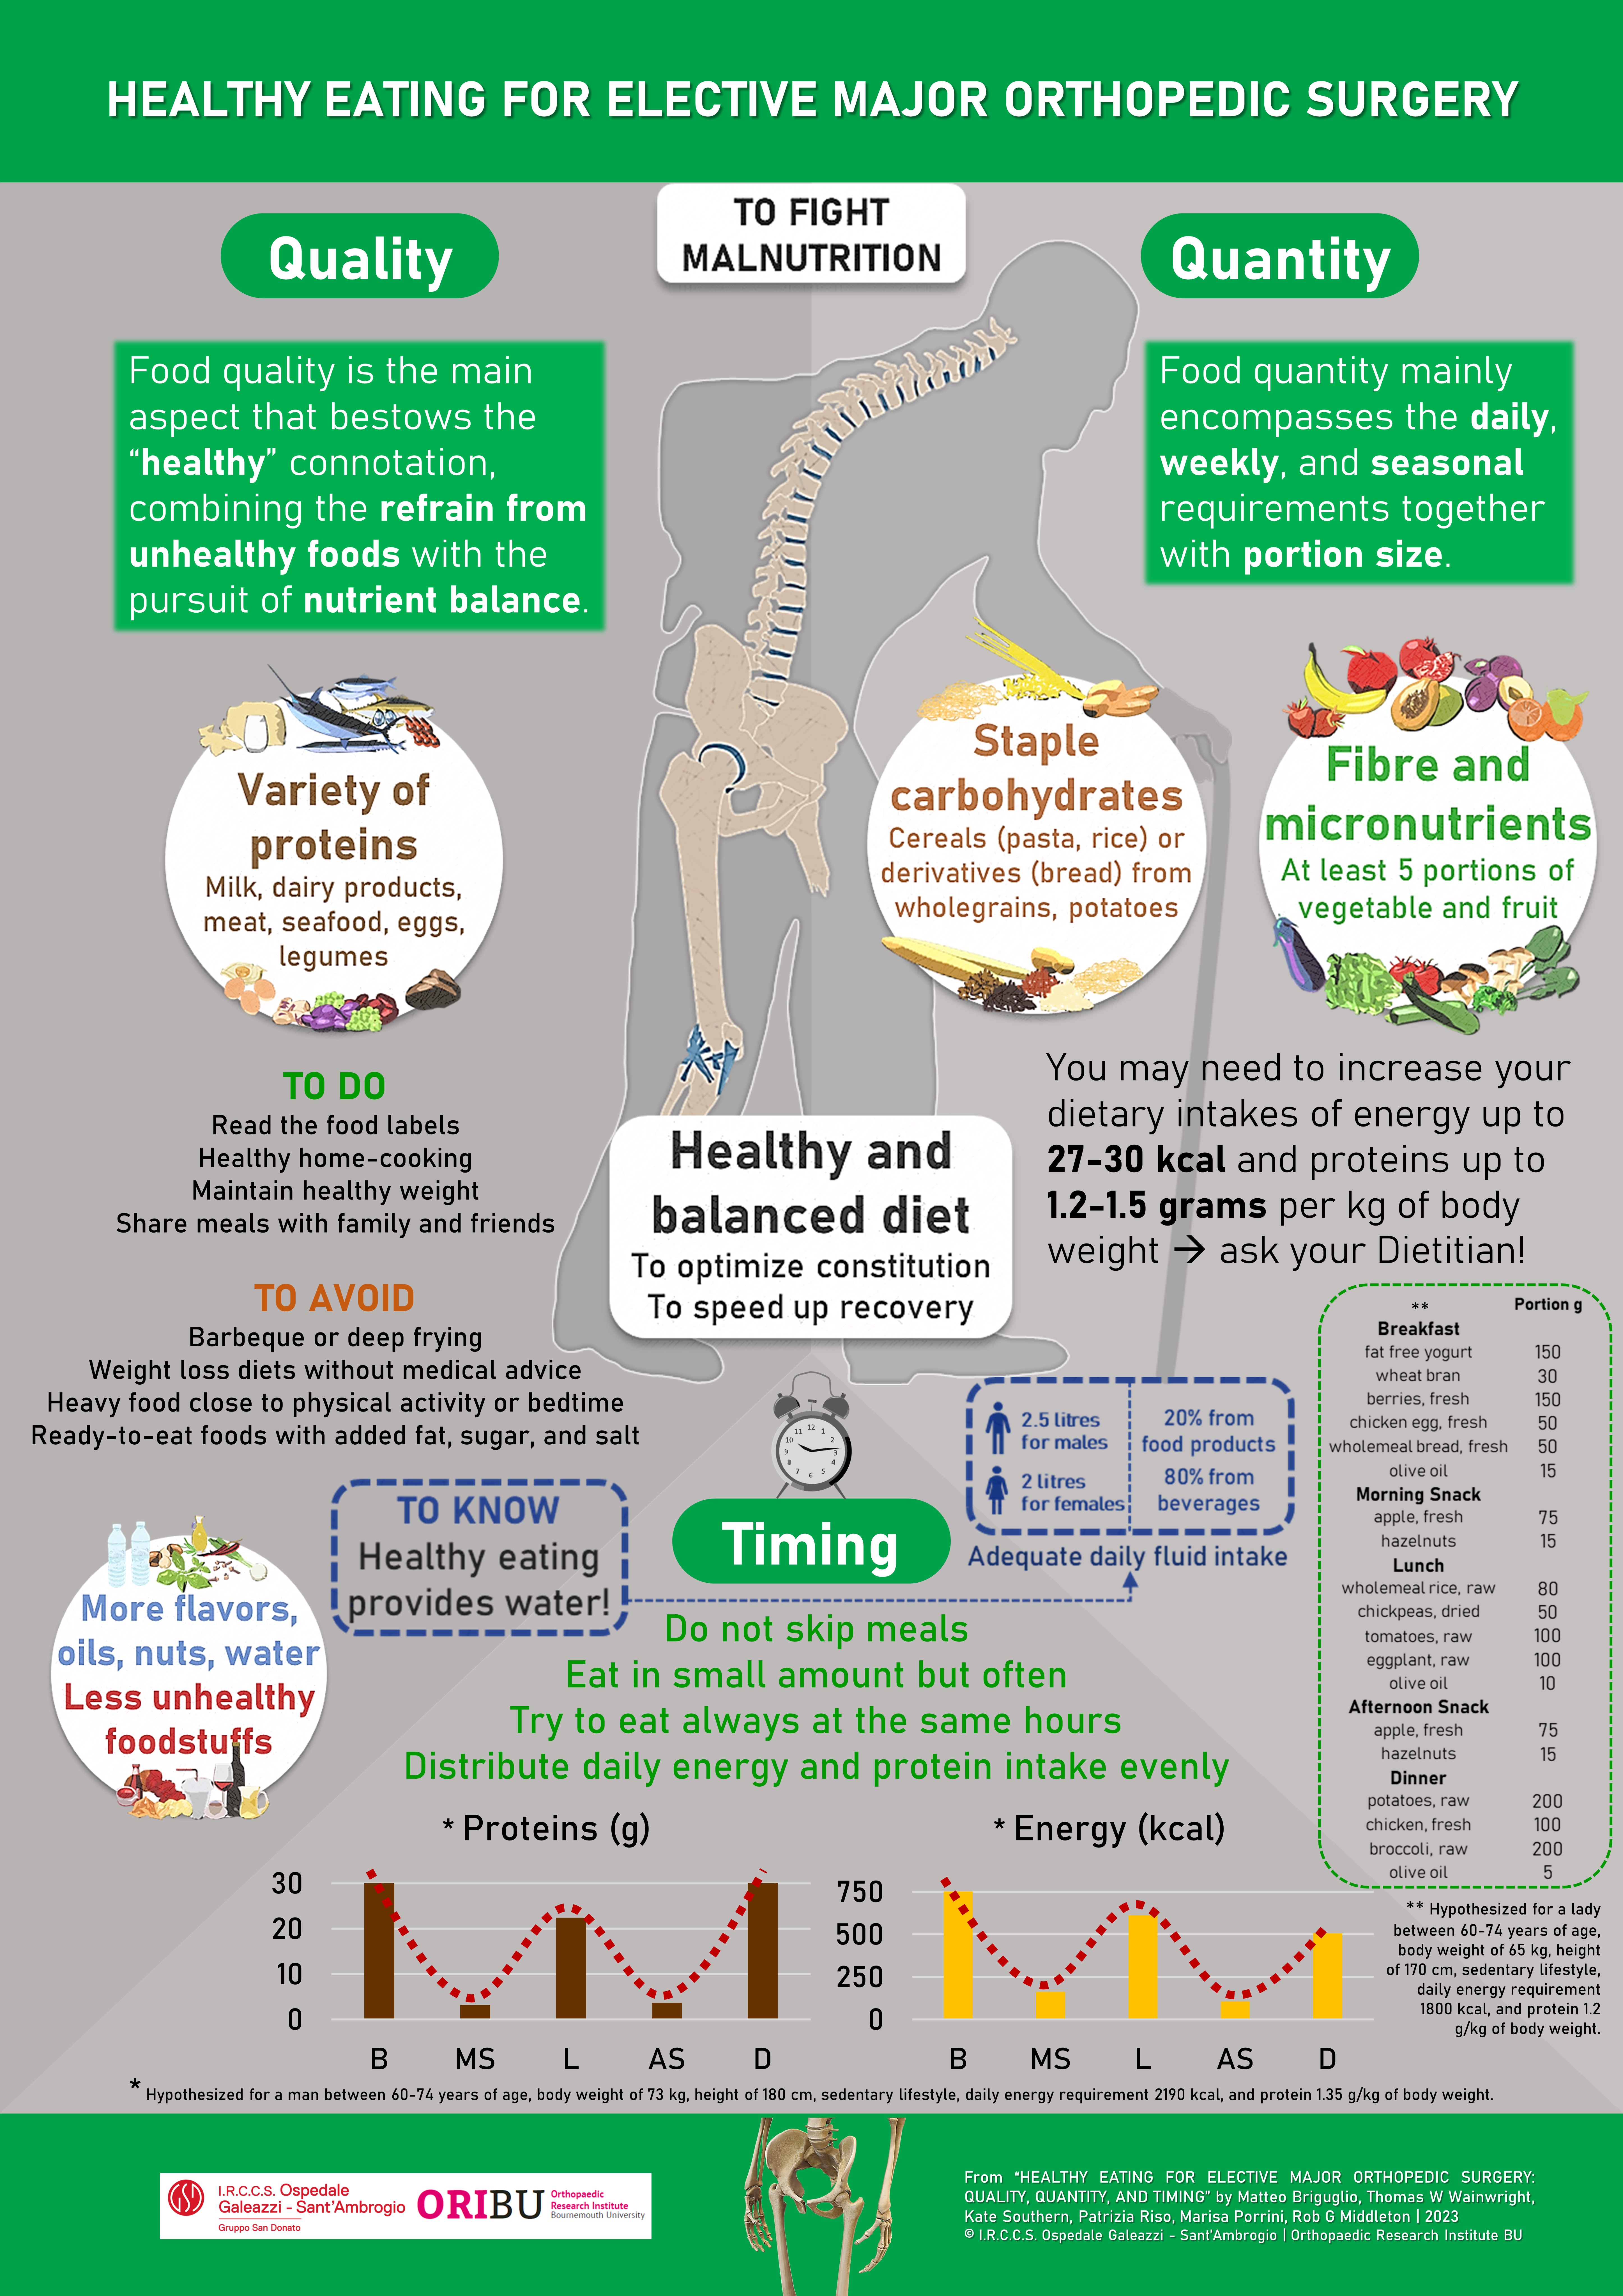

Supplement: Supplementary file 1 [file get_supplementary_file.php]
